# Supplementary material for: Dry reforming of methane over nickel supported on Nd–ceria: enhancement of the catalytic properties and coke resistance
Source: Royal Society of Chemistry journal article supplement (doi:10.1039/d0ra05761d), 2020-01-01
Supplement: d0ra05761d1.pdf [file d0ra05761d1.pdf]

## Dry reforming of methane over nickel supported on Nd-Ceria: Enhancement of the catalytic properties and coke resistance

Hugo A. Lara-García\*, Daniel G. Araiza, Melissa Méndez-Galván, Samuel Tehuacanero-Cuapa, Antonio Gómez-Cortés and Gabriela Díaz\*  
*Instituto de Física, Universidad Nacional Autónoma de México, Apartado Postal 20364, CDMX 01000, México.*

*E-mail: \*hugo.lara@fisica.unam.mx and diaz@fisica.unam.mx*

### Electronic Supplementary Information

**Table S1. CH<sub>4</sub> and CO<sub>2</sub> percentage conversion values as a function of reaction temperature.**

| Catalyst                                                  | 600 °C          |                 | 650 °C          |                 | 700 °C          |                 | 750 °C          |                 | 800 °C          |                 |
|-----------------------------------------------------------|-----------------|-----------------|-----------------|-----------------|-----------------|-----------------|-----------------|-----------------|-----------------|-----------------|
|                                                           | CO <sub>2</sub> | CH <sub>4</sub> |
| Ni/CeO <sub>2</sub>                                       | 30              | 20              | 44              | 33              | 56              | 47              | 68              | 60              | 77              | 70              |
| Ni/Ce <sub>0.95</sub> Nd <sub>0.05</sub> O <sub>2-δ</sub> | 37              | 31              | 50              | 45              | 63              | 61              | 76              | 75              | 84              | 85              |
| Ni/Ce <sub>0.9</sub> Nd <sub>0.1</sub> O <sub>2-δ</sub>   | 36              | 28              | 50              | 44              | 61              | 58              | 74              | 73              | 84              | 83              |
| Ni/Ce <sub>0.8</sub> Nd <sub>0.2</sub> O <sub>2-δ</sub>   | 36              | 30              | 47              | 44              | 60              | 58              | 71              | 71              | 79              | 80              |

**Table S2. Initial and final reactant conversions displayed in time on-stream runs at 700 C.**

| Catalyst                                                  | Initial         |                 | After 24 h      |                 | Difference (%)  |                 |
|-----------------------------------------------------------|-----------------|-----------------|-----------------|-----------------|-----------------|-----------------|
|                                                           | CO <sub>2</sub> | CH <sub>4</sub> | CO <sub>2</sub> | CH <sub>4</sub> | CO <sub>2</sub> | CH <sub>4</sub> |
| Ni/CeO <sub>2</sub>                                       | 49              | 40              | 34              | 25              | 31              | 38              |
| Ni/Ce <sub>0.95</sub> Nd <sub>0.05</sub> O <sub>2-δ</sub> | 66              | 64              | 60              | 57              | 10              | 9               |
| Ni/Ce <sub>0.9</sub> Nd <sub>0.1</sub> O <sub>2-δ</sub>   | 67              | 64              | 63              | 59              | 7               | 9               |
| Ni/Ce <sub>0.8</sub> Nd <sub>0.2</sub> O <sub>2-δ</sub>   | 66              | 63              | 62              | 56              | 7               | 10              |
